# Supplementary material for: Genotypic and phenotypic characterization of thermo-sensitive genic male sterile (TGMS) rice lines using simple sequence repeat (SSR) markers and population structure analysis
Source: PeerJ. 2025 May 8;13:e18975. doi: 10.7717/peerj.18975 (PMC12066105; doi:10.7717/peerj.18975)
Supplement: Supplemental Information 5 [file peerj-13-18975-s005.xlsx]

## Sheet: Sheet1
Supplementary file 2. p-values and F- Values of treatments and genotypes
Trait	Replication F-Calculated	Replication F-Table	Genotype F-Calculated	Genotype F-Table
Dyas to Fifty Percent Flowering	0.2112	3.08	22.8602	1.45
Plant Height (cm)	0.3688	3.08	7.6958	1.45
Productive Tillers per Plant	1.9909	3.08	33.701	1.45
Panicle Exertion (T)	0.1421	3.08	6.1065	1.45
Panicle Length (cm)	0.3698	3.08	12.7954	1.45
Pollen Sterility (%) (T)	0.2192	3.08	91.1968	1.45
Pollen Fertility (%)	0.926	3.08	59.071	1.45
Spikelet Fertility % (T)	0.7625	3.08	23.2916	1.45
Stigma Length (mm)	0.358	3.08	19.84	1.45
Stigma Exertion (%) (T)	0.2056	3.08	70.2258	1.45
Glume Angle	1.4739	3.08	104.112	1.45
Number of Grains per Panicle	0.1951	3.08	102.521	1.45
Single Plant Yield (g)	1.018	3.08	371.257	1.45
Trait	treatment	replication
Dyas to Fifty Percent Flowering	0	0.81
Plant Height (cm)	0	0.693
Productive Tillers per Plant	0	0.143
Panicle Exertion (T)	0	0.868
Panicle Length (cm)	0	0.691
Pollen Sterility (%) (T)	0	0.804
Pollen Fertility (%)	0	0.399
Spikelet Fertility % (T)	0	0.469
Stigma Length (mm)	0	0.719
Stigma Exertion (%) (T)	0	0.814
Glume Angle	0	0.234
Number of Grains per Panicle	0	0.823
Single Plant Yield (g)	0	0.365
