# Supplementary material for: Genotypic and phenotypic characterization of thermo-sensitive genic male sterile (TGMS) rice lines using simple sequence repeat (SSR) markers and population structure analysis
Source: PeerJ. 2025 May 8;13:e18975. doi: 10.7717/peerj.18975 (PMC12066105; doi:10.7717/peerj.18975)
Supplement: Supplemental Information 6 [file peerj-13-18975-s006.xlsx]

## Sheet: Sheet1
Supplementary file 3. Morphological data of 57 TGMS rice lines
Genotypes	Replication	Days to 50% flowering	Plant height(cm)	Productive tillers per plant	Panicle exertion (T)	Panicle length (cm)	Pollen sterility (%) (T)	Pollen fertility (%)	Spikelet ferility % (T)	Stigma length(mm)	Stigma exertion (%) (T)	Glume angle (0)	Number of grains per panicle	Single plant yield (g)
TNAU 1S	R1	116.183	96.4063	16.2266	62.7766	25.8555	91.5731	48.5256	52.8199	1.48762	46.3714	22.7824	215.721	17.1056
TNAU 1S	R2	110.268	87.7247	16.9622	62.3299	23.2279	82.2075	48.5769	51.54	1.52679	45.5143	21.7472	215.162	15.6925
TNAU 1S	R3	118.549	99.879	18.8012	63.8934	26.9066	95.3193	48.3975	48.3402	1.5156	48.5143	25.3704	217.117	16.7019
TNAU 2S	R1	100.804	100.795	16.8516	62.2877	26.5616	91.4167	74.5351	51.7	1.43588	44.9279	28.2918	104.525	10.4157
TNAU 2S	R2	96.049	91.0513	16.9505	70.3031	22.9179	87.411	81.8597	49.9001	1.60647	44.376	31.2812	111.899	11.1461
TNAU 2S	R3	94.1469	87.1538	17.1979	73.5092	25.5205	90.2722	71.6052	56.1999	1.36765	42.9962	30.4271	101.575	11.4382
TNAU 4S	R1	93.5864	79.0664	16.6507	67.3779	23.1022	90.5432	76.1923	57.4335	2.39673	46.9322	11.5482	248.318	32
TNAU 4S	R2	95.6542	91.3482	19.5895	63.2805	22.5914	92.2296	65.5308	60.8554	2.08745	47.4009	11.2446	221.909	31.5
TNAU 4S	R3	92.7593	82.5755	18.7498	61.6416	23.3065	86.3272	68.5769	58.4112	2.17582	47.267	12.3073	240.773	32.5
TNAU 4S-1	R1	97.8782	67.9481	14.8166	60.8007	22.8014	89.6907	54.8965	52.4315	1.67621	54.6685	13.8426	134.475	27.3412
TNAU 4S-1	R2	103.487	78.1726	16.8079	64.4745	19.649	89.737	54.6713	59.358	1.80534	55.9562	12.8931	124.894	26.6647
TNAU 4S-1	R3	95.6346	70.8694	15.3855	63.4248	20.5497	89.6722	54.8322	54.4105	1.76845	59.1753	13.1644	127.631	26.3941
TNAU 15S	R1	70.3876	86.3506	14.4257	66.9984	18.6943	92.6062	84.3101	69.1491	1.64989	28.119	27.0407	267.29	11.7244
TNAU 15S	R2	74.8498	84.7169	14.1436	68.7953	19.4828	85.825	74.9225	66.9345	1.57663	27.7202	28.6148	254.533	11.4439
TNAU 15S	R3	71.6625	80.6325	14.0307	62.5063	16.723	90.6687	71.1674	68.5164	1.39348	27.5607	29.2444	258.178	11.3317
TNAU 16S	R1	86.2706	65.3661	28.0519	84.1597	22.3762	89.6948	81.8731	64.9395	1.65813	34.6584	28.3625	129.878	34.214
TNAU 16S	R2	89.4235	71.8857	27.7973	87.8532	21.9054	89.7208	74.0075	63.6184	1.61747	36.3663	28.2167	131.28	32.1442
TNAU 16S	R3	97.3059	62.7582	27.1608	97.087	20.7285	89.6844	85.0194	68.2422	1.6744	33.9752	28.3208	131.841	35.0419
TNAU 18S	R1	90.5113	69.1185	20.113	61.3296	19.0693	93.6029	51.8603	42.793	1.62794	52.6184	11.4759	208.007	28.0967
TNAU 18S	R2	92.8371	63.526	20.8093	60.1887	18.9077	91.001	54.5548	37.8278	1.54302	49.5954	11.756	214.669	29.1524
TNAU 18S	R3	98.6515	71.3555	21.0878	64.1817	19.0231	84.4961	53.7849	44.7791	1.50905	48.3862	11.8681	231.324	28.8508
TNAU 19S	R1	99.4795	81.6488	23.4728	62.2999	22.3203	90.6987	73.6106	59.9428	1.87235	52.6992	25.4033	180.963	37
TNAU 19S	R2	110.13	73.4047	22.7109	65.425	22.7574	88.951	81.7224	60.2179	1.95706	60.0506	25.1344	162.383	37.5
TNAU 19S	R3	114.39	84.9465	20.8062	66.6751	22.9323	89.4503	84.9671	60.1393	1.66059	57.9502	24.4623	175.654	38
TNAU 23S	R1	113.932	74.617	17.3947	67.6206	18.9638	90.4237	68.8197	55.2793	2.11888	26.9873	17.0218	136.117	20.1998
TNAU 23S	R2	113.795	71.1909	17.524	67.8619	21.3547	86.8052	77.5451	58.1802	2.02448	27.762	17.6654	117.177	18.3251
TNAU 23S	R3	114.273	83.1821	17.0714	67.0174	20.6716	91.8711	81.0353	59.3405	2.15664	25.0506	15.4129	130.706	17.5752
TNAU 30S	R1	112.01	85.5888	14.5162	61.6857	23.087	16.0168	77.965	47.9638	2.10558	24.664	23.321	209.327	27.8018
TNAU 30S	R2	120.742	85.4265	12.4404	55.7573	22.6519	15.2874	70.6762	50.6446	1.92768	27.002	23.272	213.776	24.9986
TNAU 30S	R3	118.247	85.9946	13.0335	64.057	23.2611	15.4958	72.7587	46.8915	2.17674	26.334	23.307	224.897	25.7995
TNAU 31S	R1	101.527	77.4762	21.066	66.0565	21.0943	87.71	49.4233	54.9192	2.00166	36.3827	13.1029	132.936	23.1279
TNAU 31S	R2	102.581	78.3929	22.3859	59.3913	22.4376	83.7299	46.8022	61.6411	2.09336	39.2793	12.7088	127.798	23.8426
TNAU 31S	R3	98.8915	78.131	20.5381	64.1522	21.4781	97.6601	48.6744	56.8397	1.96498	40.438	14.0883	129.266	25.6295
TNAU 34S	R1	91.7864	73.1696	23.1747	62.7997	26.4316	87.324	56.9417	73.9677	1.43833	38.0642	23.1145	129.437	42
TNAU 34S	R2	103.303	77.0565	22.6116	59.3004	24.2296	91.482	61.2646	72.7892	1.56375	36.3589	19.8139	127.252	43.5
TNAU 34S	R3	107.91	86.7739	21.2037	61.7999	23.3488	90.294	62.9937	69.8431	1.52792	35.6768	22.1715	130.311	44
TNAU 37S	R1	98.5531	65.4448	19.7858	60.6261	18.1572	90.7228	74.1191	54.2363	1.70843	44.7689	28.5712	119.608	39.8416
TNAU 37S	R2	90.7877	74.5889	20.8153	55.4956	20.8938	90.0409	73.3574	52.109	1.72528	46.123	27.2151	116.825	41.6336
TNAU 37S	R3	101.659	71.9763	23.3889	62.6783	18.9391	88.3363	76.0235	59.5547	1.66629	49.5081	29.1137	126.567	39.1248
TNAU 38S	R1	107.605	92.4519	22.4062	67.2137	25.2778	89.5337	54.1619	77.3673	1.96811	37.4926	11.9922	99.2688	21.3596
TNAU 38S	R2	111.868	93.5495	21.8985	60.0147	22.2389	89.2012	52.9873	86.5309	1.87918	42.2518	11.4808	91.6416	20.5617
TNAU 38S	R3	122.526	93.9885	21.6954	62.0716	26.4933	90.3651	50.0508	73.7018	1.9427	44.1555	11.6269	97.0896	21.6787
TNAU 39S	R1	86.5965	86.3224	16.9895	61.6435	23.4258	88.5283	62.4507	58.6516	1.91111	62.7067	25.7959	174.49	16.7596
TNAU 39S	R2	87.7894	88.3072	17.0418	62.9306	22.8936	86.185	70.499	57.5113	1.89332	53.245	25.2653	185.128	16.3053
TNAU 39S	R3	83.6141	81.3605	16.9686	58.4258	22.6807	94.3867	64.7502	57.8371	1.95557	55.9483	23.9389	189.383	16.4351
TNAU 45S	R1	125.132	84.5441	10.6248	58.358	19.0169	83.0121	70.2691	53.5406	1.87066	21.9174	13.9265	226.692	24.5
TNAU 45S	R2	105.651	71.9194	12.2702	61.0681	21.4958	98.6173	73.2897	60.9126	1.98233	20.9521	13.5088	232.076	23.5
TNAU 45S	R3	111.217	75.5265	11.0949	57.2739	22.4873	87.4707	80.8412	55.6469	2.027	24.3305	12.4647	213.232	23
TNAU 50S	R1	100.961	74.6552	13.7957	65.5263	23.1882	90.1223	81.2918	52.7687	1.947	36.5765	22.7945	124.715	18
TNAU 50S	R2	117.385	77.1051	14.8886	67.1789	24.2247	89.137	78.0973	54.9253	1.71199	34.1059	23.1315	136.139	19.5
TNAU 50S	R3	105.654	83.2297	15.3257	61.3948	20.5971	89.8408	70.1109	51.906	2.04101	33.1176	23.9739	120.146	19.5
TNAU 51S	R1	100.583	84.3644	19.7583	61.2444	21.2863	88.3744	83.4353	57.4943	1.84101	34.6155	23.6364	118.92	40.4912
TNAU 51S	R2	113.563	80.2267	19.9349	65.5222	23.1128	89.2581	76.5162	63.9793	2.02531	39.0379	21.9545	135.27	39.1066
TNAU 51S	R3	109.854	81.4089	19.3169	59.5333	22.5909	91.4675	73.7485	62.1264	1.89367	32.8466	24.3091	141.81	39.5022
TNAU 53S	R1	111.613	72.7096	18.6135	64.4633	26.2385	18.0017	81.6398	55.9144	1.57782	45.9771	16.4075	192.933	18.6789
TNAU 53S	R2	110.84	69.1403	20.7591	63.6469	24.2779	16.9996	76.465	56.2714	1.45555	49.8807	15.8226	186.767	18.0367
TNAU 53S	R3	113.547	70.1601	21.6174	64.7898	23.4936	16.5987	74.3951	56.4142	1.40664	51.4422	17.8699	184.3	20.2845
TNAU 59S-1	R1	108.304	71.3344	17.5773	64.8304	21.9898	92.9433	78.2039	57.4419	1.60332	44.6645	12.7203	102.268	32
TNAU 59S-1	R2	111.784	79.2539	17.0003	67.0911	22.84	87.2675	80.4118	63.6395	1.46167	45.0766	10.9348	110.927	32.5
TNAU 59S-1	R3	106.912	82.4217	17.4124	59.1785	23.1801	88.8892	72.6842	66.1186	1.40501	44.9589	11.4449	98.805	33.5
TNAU 59S-2	R1	102.338	71.4831	16.0378	66.3506	23.4315	88.9234	75.5783	55.8407	1.81757	40.106	17.9338	124.695	25.2962
TNAU 59S-2	R2	105.446	71.7893	16.0126	63.0975	22.4246	89.4411	73.7623	55.1373	1.73311	41.9179	19.765	132.406	25.551
TNAU 59S-2	R3	113.216	70.7176	15.9496	67.6519	23.1438	90.7354	75.0594	56.122	1.69932	35.5761	17.2013	126.898	25.6529
TNAU 60S	R1	136.062	81.5869	14.3077	59.3353	23.4897	90.6613	67.6602	45.9873	1.75319	36.8897	19.5847	138.64	31
TNAU 60S	R2	140.584	82.1007	12.7693	62.2912	22.6912	85.8547	72.9799	53.5345	1.69957	42.1577	21.6613	130.147	32
TNAU 60S	R3	137.354	80.3023	14.923	63.4735	23.8091	92.584	71.46	51.3782	1.88724	40.6526	18.754	136.213	33
TNAU 71S	R1	115.224	88.1995	15.3932	59.3183	24.5924	90.1037	74.5576	39.6175	1.18542	30.1765	17.8692	181.594	29.5954
TNAU 71S	R2	117.035	86.5984	14.8395	60.4204	21.2282	90.9112	77.9232	39.3392	1.19514	28.6426	15.141	182.782	30.1012
TNAU 71S	R3	115.741	92.2021	16.7773	60.8613	22.1894	88.0851	75.5192	38.6434	1.21944	29.0809	17.0897	178.624	30.3035
TNAU 82S	R1	111.279	80.6506	14.9374	63.7312	19.5352	30.8239	78.4031	64.4032	1.6968	50.0611	15.0805	104.599	35
TNAU 82S	R2	109.886	69.7991	14.4695	64.9935	21.3898	28.3321	85.3874	63.0097	1.86282	44.9847	14.9397	111.602	36.5
TNAU 82S	R3	111.836	77.5502	14.6032	60.5753	20.0651	29.044	75.6094	67.8871	1.63039	42.9542	14.9799	101.798	35.5
TNAU 83S	R1	109.544	84.6722	18.15	66.4425	19.4035	89.4761	82.3965	42.849	2.19118	42.0215	18.4595	159.45	23.5
TNAU 83S	R2	108.515	82.0041	17.7901	65.1475	19.5505	89.9986	76.1509	42.683	2.0147	42.9405	18.0873	184.066	22
TNAU 83S	R3	105.941	75.3337	19.0498	61.91	19.0361	89.6254	73.6526	42.268	1.94411	45.238	18.3532	166.483	22.5
TNAU 85S	R1	105.844	76.391	18.9592	61.5836	20.5864	97.6785	76.0087	52.782	2.32269	32.5457	27.4326	125.677	19.1582
TNAU 85S	R2	99.789	87.9154	18.5397	54.6658	19.7592	83.7162	77.1362	50.6795	2.15683	35.7907	26.2777	141.992	18.9604
TNAU 85S	R3	97.3669	79.6837	17.491	64.3507	22.6544	87.7054	79.9551	49.8385	2.09049	34.8636	30.3197	137.331	18.8813
TNAU 86S	R1	110.213	81.5061	15.649	60.5334	21.802	30.7712	63.7103	65.1054	2.17738	31.891	11.8074	243.472	19.2371
TNAU 86S	R2	99.1482	83.1783	15.2503	65.2416	21.406	25.9385	71.8224	63.3486	2.18196	31.2773	12.0223	225.382	20.5514
TNAU 86S	R3	114.639	77.3257	15.0908	67.1249	22.792	29.3904	75.0673	62.6459	2.18065	31.0318	11.2703	218.146	18.7114
TNAU 92S	R1	94.5876	83.7368	18.8865	58.7466	20.0749	89.5999	75.7148	33.2571	2.05208	67.4639	26.6687	198.456	10.5175
TNAU 92S	R2	91.7627	83.2283	18.6595	57.0045	19.1301	89.6666	73.5445	35.8107	2.11844	68.5916	27.7562	191.369	9.61187
TNAU 92S	R3	101.65	83.0249	19.454	58.2489	19.805	89.8335	81.1407	36.8322	2.09948	64.6445	30.475	216.175	9.87062
TNAU 93S	R1	89.8428	61.8778	21.8311	66.112	15.5498	37.1129	8.25064	42.2121	1.53819	38.1967	18.7701	94.0118	30.5
TNAU 93S	R2	92.543	62.2935	22.8333	64.3361	14.5877	36.4376	8.01688	40.4364	1.82136	39.5322	17.6731	90.0353	29.5
TNAU 93S	R3	90.6143	60.8386	19.3256	70.5519	14.8626	34.7495	7.43248	46.6515	1.74045	42.871	18.4567	103.953	30.5
TNAU 95S	R1	112.412	79.2255	26.9292	57.9935	19.5302	84.8489	81.8316	60.4994	1.82018	32.6357	20.3253	185.692	23.9796
TNAU 95S	R2	110.352	77.0164	23.5531	64.026	20.9299	93.3383	88.1735	62.8983	1.84309	30.7161	20.1084	185.075	24.0816
TNAU 95S	R3	113.236	84.7481	24.5177	55.5805	20.53	90.9128	79.2949	54.5023	1.82673	29.9483	19.5662	187.234	23.9388
TNAU 98S	R1	122.091	90.9497	20.1389	64.5485	26.2422	90.4341	72.3108	57.1771	1.78957	19.5742	28.3083	163.534	28.2479
TNAU 98S	R2	126.545	89.5092	21.0943	65.4495	22.5738	91.9023	85.5856	54.7915	1.96511	19.3914	28.2938	192.621	27.7436
TNAU 98S	R3	123.364	94.551	19.7567	67.702	25.1941	86.7636	76.1036	58.1314	2.03532	18.9344	28.2979	171.845	29.5086
TNAU 100S	R1	135.875	85.9876	14.7488	65.8306	23.4445	85.176	65.8513	48.8806	2.16829	32.1417	23.3974	156.022	19.0458
TNAU 100S	R2	118.594	87.6995	15.1363	67.9174	23.5948	90.831	69.9316	51.1548	2.35793	32.025	24.4658	134.971	19.639
TNAU 100S	R3	123.531	85.3029	16.1049	68.7521	23.9707	93.093	67.0171	52.0645	2.43378	32.4333	27.1368	150.007	19.2153
TNAU 101S	R1	107.709	72.8327	13.4065	54.082	22.4586	89.6252	77.9851	54.2795	2.00133	35.569	19.7341	166.583	8.18057
TNAU 101S	R2	97.7179	72.0576	14.0222	55.7607	21.8156	89.9992	78.5554	48.8903	1.87467	34.6563	19.2022	150.854	7.05923
TNAU 101S	R3	100.573	70.1197	15.5614	59.9573	22.7158	89.4756	76.5595	50.4301	1.824	32.3747	21.0637	144.563	7.86019
TNAU 102S	R1	96.1418	82.5202	14.1806	58.4634	22.8642	91.5257	78.6387	49.4058	1.68177	37.2882	10.9896	111.46	21.6425
TNAU 102S	R2	94.4254	83.2867	16.787	67.4154	27.0777	95.1771	78.0129	52.3707	1.69392	35.4645	12.6471	107.135	20.8681
TNAU 102S	R3	100.433	85.2031	16.0423	61.0211	24.0681	82.3972	76.4484	51.5236	1.72431	41.8473	11.4632	105.405	21.0894
TNAU 103S	R1	98.5029	79.0612	13.7454	67.3781	26.7498	91.7302	82.0398	61.0525	1.92887	34.6266	23.196	149.242	23.1509
TNAU 103S	R2	96.6243	88.8766	13.2485	64.526	24.6509	81.5791	72.8651	59.4175	1.83452	32.8434	19.7053	143.031	23.8373
TNAU 103S	R3	95.8729	86.0722	12.0062	57.3959	27.5893	95.7907	69.1952	55.3299	1.96661	32.1301	22.1987	151.727	24.1118
TNAU 106S	R1	114.572	83.2733	17.9783	65.0726	17.209	88.1135	75.17	63.6877	1.93803	36.3063	21.3895	196.63	27.0554
TNAU 106S	R2	101.712	86.907	19.7368	64.3575	14.5158	91.8153	76.8733	64.463	1.68595	35.919	22.9421	198.877	25.0595
TNAU 106S	R3	119.716	81.8198	17.2749	62.5699	15.2853	89.1712	75.6567	61.7493	1.86601	37.2746	20.7684	204.494	26.4851
TNAU 107S	R1	146.894	77.9615	22.2456	66.0486	20.3419	89.4972	75.8954	58.5031	1.71284	38.2421	16.7334	185.188	13.0353
TNAU 107S	R2	155.83	75.7014	22.6678	59.8054	21.9823	90.5114	75.7285	59.6625	2.00537	35.0316	16.8002	215.083	15.0735
TNAU 107S	R3	153.277	76.3471	22.0767	68.5459	19.6858	89.0915	75.7762	58.8344	1.92179	39.5263	16.5664	193.729	14.4912
TNAU 111S	R1	148.438	89.3567	23.4173	60.5835	21.2861	89.1054	46.2125	49.368	1.87031	29.093	10.6401	162.895	30.3541
TNAU 111S	R2	156.749	76.4825	21.6457	63.1945	23.4285	87.9163	42.6502	56.424	1.8101	34.0093	12.4949	159.578	31.0836
TNAU 111S	R3	150.813	80.1608	20.937	69.7221	24.2855	92.0782	47.6374	54.408	1.65958	30.4977	11.965	160.526	30.0623
TNAU 112S	R1	64.4455	100.453	16.4818	73.0485	20.5758	96.3138	44.3646	70.7306	2.4772	66.304	23.1112	34.212	20.2563
TNAU 112S	R2	63.0152	90.5118	15.1242	67.3629	20.0586	84.7396	42.2937	63.5776	2.4307	74.7839	22.1704	34.6361	23.8583
TNAU 112S	R3	59.4394	86.5354	16.0939	65.0886	18.7656	88.0465	49.5417	73.5918	2.4121	62.9121	19.8183	33.1519	21.2854
TNAU 113S	R1	98.9135	78.751	22.7008	57.9238	17.3652	88.3838	6.69993	53.6547	2.4018	28.2483	20.1092	326.014	36
TNAU 113S	R2	110.272	79.5837	23.4423	55.7713	18.8892	94.9647	7.07502	53.3811	2.53865	29.9138	19.8544	336.043	37.5
TNAU 113S	R3	114.815	81.6653	20.847	63.305	16.7556	85.7515	7.22505	53.7641	2.49955	29.4379	20.0364	300.943	36.5
TNAU 114S	R1	109.41	77.2119	16.3149	56.7708	18.0363	18.9254	75.3472	53.4771	2.10794	43.5437	24.6817	331.857	43.754
TNAU 114S	R2	122.36	74.9757	16.9447	65.239	18.4588	20.7983	77.1113	52.0057	2.16382	41.6312	24.045	302.573	42.4345
TNAU 114S	R3	104.23	82.8024	14.7404	59.1903	19.515	18.1763	74.6415	51.4171	1.96824	48.3251	26.2733	343.571	42.8115
TNAU 115S	R1	95.024	87.0222	17.5768	57.8864	25.9736	70.3026	70.4188	65.5616	1.88446	32.8873	26.2805	181.419	15.4854
TNAU 115S	R2	103.744	94.7404	20.6449	48.8182	23.7019	75.9244	62.4416	63.6539	1.79339	33.6958	29.8146	189.775	16.386
TNAU 115S	R3	107.232	89.2274	19.7683	55.2955	25.3245	78.1731	68.1396	58.8845	2.11215	35.717	28.8049	183.806	16.1287
TNAU 115S-1	R1	126.06	82.1396	23.3001	54.7033	23.6568	94.7699	72.438	63.7329	1.84176	34.6174	30.0146	198.719	15.6142
TNAU 115S-1	R2	109.587	78.6276	19.8524	54.2344	23.2483	82.9401	62.9215	65.7986	1.95206	33.4102	26.0139	189.573	16.0964
TNAU 115S-1	R3	121.353	77.2228	20.8375	53.0623	23.0849	91.39	65.6405	58.5686	1.99618	34.2725	28.8715	166.708	16.2893
TNAU 116S	R1	107.974	81.6336	18.8603	62.7549	20.1965	94.8582	43.8755	56.9642	1.86712	47.0062	13.3981	138.521	14.5
TNAU 116S	R2	109.991	83.8779	18.7334	64.4648	20.0655	82.8224	44.498	54.2478	1.98151	46.4186	12.9076	148.972	15.5
TNAU 116S	R3	115.034	89.4886	18.4163	58.4802	19.7381	91.4194	43.6265	56.1881	1.82137	48.4752	13.5943	141.507	14.5
TNAU 120S	R1	109.21	90.65	16.1049	75.7784	19.5469	89.0188	58.786	52.6708	1.50011	24.2398	20.2474	126.352	18.5577
TNAU 120S	R2	100.197	82.3375	18.1934	67.8054	21.8123	90.6083	61.6785	52.4124	1.73318	24.9195	22.0631	114.591	18.4567
TNAU 120S	R3	96.5923	79.0125	16.7016	64.6162	18.6408	89.4729	62.8355	53.3169	1.5667	22.5406	22.7894	131.057	18.4856
TNAU 126S-1	R1	109.754	82.9276	19.2194	75.7207	22.0689	91.2544	74.5404	69.1922	2.20644	27.9544	32.8025	134.543	25.3778
TNAU 126S-1	R2	94.4346	87.1959	21.8576	68.9448	22.4696	90.2181	81.2947	66.2019	2.25933	27.1274	31.4244	136.826	24.7167
TNAU 126S-1	R3	98.8115	97.8665	22.9129	66.2345	23.4715	87.6275	79.3649	65.0058	2.07422	27.7181	30.8731	133.63	24.9056
TNAU 126S-2	R1	113.345	95.5322	14.808	77.1847	22.4379	89.1363	82.8231	68.1474	2.16333	26.2128	31.0732	131.437	24.6556
TNAU 126S-2	R2	109.782	91.8441	14.4893	65.1365	22.6536	89.8409	72.5025	70.8421	2.12999	28.6404	32.5357	133.812	24.8852
TNAU 126S-2	R3	100.874	82.6238	13.6927	68.5788	21.8986	90.1228	79.8744	61.4106	2.24667	27.9468	31.4911	139.75	25.4592
TNAU 127S	R1	111.784	82.1118	20.2334	56.7542	24.2295	84.4697	76.9486	48.727	1.38896	40.5679	14.8225	138.136	16.9962
TNAU 127S	R2	112.865	87.3846	19.3601	67.1277	24.4054	96.6737	78.2459	43.2547	1.62471	41.5038	14.2099	147.457	14.6718
TNAU 127S	R3	111.352	89.4937	22.4165	59.7181	24.3551	87.9566	73.7055	44.8182	1.45632	38.2283	15.0676	134.408	16.3321
TNAU 129S	R1	100.126	95.2185	17.3453	61.4066	19.8821	14.0231	84.7501	58.4771	1.76025	43.5284	11.6499	209.225	14.4879
TNAU 129S	R2	98.7186	82.0087	18.969	63.1451	20.4717	14.4694	73.1124	51.8807	1.98731	49.7787	11.5496	208.1	13.5483
TNAU 129S	R3	98.1557	85.7829	16.6958	62.6484	19.6462	12.9075	76.4375	49.2422	1.92244	47.9929	11.9005	209.675	14.8638
TNAU 131S	R1	99.1619	81.3511	14.4814	65.9786	18.4098	85.1473	77.5091	57.0588	1.82872	32.393	20.4158	144.408	42.5708
TNAU 131S	R2	97.1286	83.0642	16.4615	59.1304	17.8893	90.8382	75.0364	58.5764	1.98511	29.1517	23.4123	133.194	43.1124
TNAU 131S	R3	97.7095	82.5747	15.0471	56.3911	19.7109	93.1145	68.8545	53.2648	1.76617	27.8552	21.2719	136.398	41.2168
TNAU 132S	R1	108.115	88.0986	10.6683	58.5015	24.149	87.4588	77.7214	44.9388	2.20821	54.7285	15.9723	144.732	15.785
TNAU 132S	R2	107.914	84.2555	9.49874	58.494	21.5608	98.6646	75.9447	48.2448	2.15885	57.6929	16.8819	136.451	16.0537
TNAU 132S	R3	107.971	89.6359	9.83291	58.5045	22.3003	82.9765	75.234	43.6164	2.17295	58.8787	17.2458	138.817	16.1612
TNAU 135S	R1	118.517	84.8061	14.3578	58.565	21.9613	94.7533	79.3695	63.1275	1.83499	38.4078	10.6244	194.978	27.42
TNAU 135S	R2	119.551	84.211	14.7481	60.7883	20.4883	88.4367	79.1085	56.0931	1.63668	33.3191	9.53167	175.088	28.96
TNAU 135S	R3	115.931	83.9729	14.9042	66.3466	21.5404	85.91	80.022	53.2794	1.77833	34.773	9.84389	202.934	28.52
TNAU 136S	R1	99.115	80.8809	19.6247	64.9103	18.313	92.3817	15.6453	56.518	2.04925	49.0012	22.3879	159.2	26
TNAU 136S	R2	92.7213	71.8673	20.214	74.453	18.3243	86.1244	13.673	50.9955	2.02308	51.2497	20.7828	163.199	27
TNAU 136S	R3	90.1638	68.2618	18.1514	67.6368	18.3527	90.5939	15.0818	48.7865	1.95766	52.1491	21.9293	157.601	27.5
TNAU 137S-1	R1	119.586	97.9323	18.568	60.4002	22.4214	70.4841	57.1465	57.1387	2.06265	56.5685	13.4189	174.444	28.3885
TNAU 137S-1	R2	102.81	88.8544	19.0781	60.8007	23.2641	84.1619	53.0401	59.9653	1.98796	50.1486	13.3396	180.815	28.2779
TNAU 137S-1	R3	107.603	85.2233	18.3639	59.3991	20.3145	80.254	54.2134	61.096	2.24939	51.9829	13.1415	196.741	28.2337
TNAU 137S-2	R1	102.649	83.096	14.639	61.1518	24.6816	76.5466	59.6497	56.7214	2.14284	53.1243	13.4378	168.371	30
TNAU 137S-2	R2	115.135	90.476	17.0447	63.0553	22.1671	85.3136	53.5876	62.9715	2.06787	52.6009	12.7486	195.722	28
TNAU 137S-2	R3	106.216	93.428	15.3263	56.393	21.1613	73.0398	51.1627	58.5071	2.08929	52.9748	13.7135	187.907	28.9
TNAU 142S	R1	103.307	89.5844	12.6247	61.363	25.6331	76.6872	84.5759	53.5035	1.81659	63.7339	19.0168	231.545	37.0264
TNAU 142S	R2	100.258	101.984	15.0315	59.5877	26.4892	74.3624	71.318	50.9861	1.99585	57.5882	18.5389	230.634	35.7552
TNAU 142S	R3	102.436	98.4414	14.3438	55.1493	25.8777	68.5504	75.106	54.5104	2.06756	61.978	17.3442	233.822	36.1184
TNAU 143S	R1	100.151	78.4104	17.3952	65.8125	19.099	94.5157	74.1299	55.8251	1.70897	43.8628	28.0982	129.942	31
TNAU 143S	R2	109.397	74.5712	19.0311	67.6374	22.4258	88.4961	77.4675	51.1996	1.92276	42.9885	28.4514	147.515	32
TNAU 143S	R3	96.452	88.0084	18.5637	61.2501	21.4753	86.0883	78.8026	57.6753	2.00827	46.0487	28.3505	154.544	32.5
