# Supplementary material for: Genotypic and phenotypic characterization of thermo-sensitive genic male sterile (TGMS) rice lines using simple sequence repeat (SSR) markers and population structure analysis
Source: PeerJ. 2025 May 8;13:e18975. doi: 10.7717/peerj.18975 (PMC12066105; doi:10.7717/peerj.18975)
Supplement: Supplemental Information 7 [file peerj-13-18975-s007.xlsx]

## Sheet: sheet 1
markers	bp	TNAU 1S	TNAU 2S	TNAU 4S	TNAU 4S-1	TNAU 15S	TNAU 16S	TNAU 18S	TNAU 19S	TNAU 23S	TNAU 30S	TNAU 31S	TNAU 34S	TNAU 37S	TNAU 38S	TNAU 39S	TNAU 45S	TNAU 50S	TNAU 51S	TNAU 53S	TNAU 59S-1	TNAU 59S-2	TNAU 60S	TNAU 71S	TNAU 82S	TNAU 83S	TNAU 85S	TNAU 86S	TNAU 92S	TNAU 93S	TNAU 95S	TNAU 98S	TNAU 100S	TNAU 101S	TNAU 102S	TNAU 103S	TNAU 106S	TNAU 107S	TNAU 111S	TNAU 112S	TNAU 113S	TNAU 114S	TNAU 115S	TNAU 115S-1	TNAU 116S	TNAU 120S	TNAU 126S-1	TNAU 126S-2	TNAU 127S
RM319	134bp	1	0	1	1	1	1	1	0	1	1	1	1	0	1	1	1	1	1	1	1	1	0	1	1	1	1	1	1	1	1	1	1	0	1	1	0	1	1	1	1	1	1	1	1	1	1	1	1
RM319	175bp	0	1	0	0	0	0	0	1	0	0	0	0	1	0	0	0	0	0	0	0	0	1	0	0	0	0	0	0	0	0	0	0	1	0	0	1	0	0	0	0	0	0	0	0	0	0	0	0
RM22597	249bp	0	1	1	1	1	1	1	1	1	1	1	0	0	1	1	1	1	1	1	1	1	0	1	1	0	1	1	1	1	0	1	1	1	1	0	1	1	1	1	1	1	1	1	1	1	1	1	1
RM22597	255 bp	0	0	0	0	0	0	1	1	1	0	0	0	0	1	0	1	0	1	1	1	0	0	0	0	0	0	0	0	0	0	0	1	1	1	1	0	0	0	0	0	0	0	1	1	1	1	0	0
RM3533	125 bp	0	0	0	0	0	0	0	0	0	0	0	0	1	0	1	0	0	0	0	0	0	0	0	1	0	0	0	0	0	0	0	0	0	0	0	0	0	0	1	0	0	0	0	1	0	1	0	0
RM3533	120 bp	1	1	1	1	1	1	1	1	1	1	1	1	0	1	0	1	1	1	1	1	1	1	1	0	1	1	1	1	1	0	1	1	1	1	1	1	1	1	0	1	1	1	1	0	1	0	1	1
RM7653	121 bp	1	1	1	1	1	1	1	1	1	1	1	0	1	0	0	1	1	1	1	1	1	1	1	0	0	1	1	1	1	0	1	1	1	1	1	1	1	1	1	1	1	1	1	1	1	1	1	1
RM7653	125 bp	0	0	0	0	0	0	0	0	0	0	0	1	0	1	0	0	0	0	0	0	0	0	1	0	0	0	0	0	0	0	0	0	0	0	0	0	0	0	0	0	0	0	0	1	0	1	0	0
RM4601	118bp	1	1	0	1	1	1	1	1	1	1	1	1	1	0	1	0	1	0	1	1	1	0	1	1	0	1	1	1	0	1	1	1	1	1	1	1	1	1	1	1	0	1	1	0	0	0	0	0
RM4601	120 bp	0	0	0	1	0	0	0	0	0	0	0	0	0	0	0	0	1	0	0	0	0	0	0	0	0	0	0	0	0	0	0	0	0	0	0	0	0	0	0	0	0	0	0	0	0	0	0	0
RM4601	115 bp	0	0	0	0	0	0	0	0	0	0	0	0	0	0	0	0	0	0	1	0	0	0	0	0	0	0	0	0	1	0	0	0	0	0	1	0	0	0	0	0	1	0	0	0	0	0	0	0
RM13912	190 bp	0	1	1	1	1	1	1	1	1	1	1	1	1	1	1	1	1	1	1	0	1	1	1	1	1	0	1	1	1	0	1	1	1	1	1	1	1	0	1	0	1	1	1	1	0	1	1	1
RM13912	195 bp	0	0	0	0	0	0	0	0	0	0	0	0	0	0	0	0	0	0	0	1	0	0	0	0	0	1	0	0	0	0	0	0	0	0	0	0	0	0	1	0	0	0	0	0	0	0	0	0
RM13912	185 bp	0	0	0	0	0	0	0	0	0	0	0	0	0	0	0	0	0	0	0	0	0	0	0	1	0	0	0	0	0	0	0	0	0	0	0	0	0	0	0	0	0	0	0	0	0	1	0	0
RM36	192 bp	0	1	1	1	1	1	1	1	1	1	1	1	0	1	1	1	1	1	1	0	1	1	1	0	0	0	1	1	1	0	1	1	1	1	1	1	1	0	1	0	1	1	1	1	0	1	1	1
RM36	197 bp	0	0	0	0	0	0	0	0	0	0	0	0	0	0	0	0	0	0	0	1	0	0	0	0	0	0	0	0	0	0	0	0	0	0	0	0	0	0	0	0	0	0	0	0	1	0	0	0
RM36	180 bp	0	0	0	0	0	0	0	0	0	0	0	0	1	0	0	0	0	0	0	0	0	0	0	1	0	0	0	0	0	0	0	0	0	0	0	0	0	0	1	0	0	0	0	1	0	0	0	0
RM81	110 bp	1	0	1	0	1	0	0	0	1	0	0	0	0	0	0	1	0	0	0	0	1	1	1	1	0	0	1	0	0	0	1	1	1	1	1	1	1	1	1	1	1	0	0	0	1	0	1	0
RM81	120bp	0	1	0	1	1	0	0	1	0	1	1	0	1	0	0	1	0	0	0	0	0	0	0	0	0	0	1	0	0	0	0	0	0	0	0	0	0	0	0	0	0	0	0	0	0	0	0	0
RM81	105 bp	0	0	0	0	0	0	0	0	1	0	0	1	0	0	1	0	0	1	1	1	0	0	0	0	0	0	0	0	0	0	0	0	0	0	0	0	0	0	1	0	0	1	0	0	1	1	0	0
RM 1018	160bp	1	0	1	1	1	1	1	1	1	1	1	1	1	1	1	1	1	1	0	1	0	0	0	1	1	1	0	1	0	1	1	1	1	1	1	1	0	0	1	1	1	0	1	1	0	0	0	1
RM 1018	170 bp	0	1	1	0	1	0	0	1	1	1	1	1	1	1	1	0	1	0	1	1	1	1	0	1	1	0	1	1	1	0	0	1	1	1	0	0	1	0	0	0	1	1	0	0	1	1	1	0
RM 286	110 bp	1	1	0	1	0	1	1	0	1	0	0	0	1	1	1	0	1	1	1	0	0	1	0	0	1	1	1	1	0	1	1	1	0	0	1	0	1	0	0	0	1	0	0	1	1	0	0	0
RM 286	100bp	1	1	1	0	1	0	0	1	0	1	1	1	0	0	1	0	0	0	0	1	1	0	1	1	0	0	0	0	0	0	0	0	0	0	0	1	1	0	0	0	1	0	1	1	1	1	0	0
RM1896	102bp	0	0	0	0	1	0	0	1	0	1	1	1	1	0	0	1	0	0	0	0	1	1	1	1	0	0	0	0	0	0	0	0	1	1	0	1	0	1	1	1	0	1	1	0	0	1	1	1
RM1896	108bp	1	1	1	1	0	1	1	0	1	0	0	0	1	1	1	0	1	1	1	0	0	1	0	0	1	1	1	1	0	1	1	1	0	1	1	0	0	1	1	1	0	0	0	1	0	1	0	1
RM 8134	111bp	1	1	0	1	0	1	1	1	0	0	0	0	1	1	1	0	1	1	1	0	0	1	0	0	1	0	0	0	0	1	1	1	0	0	1	0	1	0	0	0	1	0	0	1	1	0	0	0
RM 8134	107bp	0	0	0	0	1	0	0	1	0	1	1	1	0	0	1	0	0	0	0	1	1	0	1	1	0	0	0	0	0	0	0	0	1	1	0	1	0	1	1	1	0	1	1	0	0	1	1	1
RM5709	113BP	1	1	1	0	1	1	1	0	0	1	0	1	0	0	1	0	0	0	1	1	0	0	0	1	1	1	1	1	1	1	1	1	1	1	1	1	1	1	1	1	1	1	1	1	1	1	0	0
RM5709	110bp	0	0	0	0	0	0	0	0	0	1	0	1	0	0	1	0	0	0	1	1	0	0	0	1	0	0	0	0	0	0	0	0	0	0	0	0	0	0	0	0	0	0	0	0	0	0	0	1
RM310	105bp	1	1	0	1	0	1	1	0	1	0	0	0	1	1	1	0	1	1	1	0	0	1	0	0	1	1	1	1	0	1	1	1	0	0	1	0	1	0	0	0	0	0	0	1	1	0	0	0
RM310	100bp	0	0	0	0	1	0	0	1	0	1	1	1	0	0	0	1	0	0	0	1	1	0	1	1	0	0	0	0	0	0	0	0	1	1	0	1	0	1	1	1	0	1	1	0	0	1	1	1
RM559	180bp	1	0	1	0	0	0	1	1	0	1	0	0	1	1	1	1	1	0	1	1	0	0	0	0	0	0	1	1	1	1	1	1	1	1	1	1	1	1	1	1	1	1	1	0	0	1	1	0
RM559	160bp	0	1	0	0	0	0	0	0	0	0	0	0	0	0	0	0	1	0	0	0	0	0	1	1	1	1	0	0	0	0	0	0	0	0	0	0	0	0	0	0	0	0	0	0	0	0	0	1
RM16559	210bp	0	1	0	0	0	0	1	0	0	0	0	0	0	0	0	0	0	1	1	1	0	1	1	0	0	0	0	1	1	0	0	0	0	0	0	0	1	0	0	1	0	0	1	0	0	0	0	0
RM16559	197 bp	1	1	0	1	1	1	1	1	0	1	1	1	1	1	1	1	1	0	0	0	1	1	1	1	0	1	1	0	0	1	1	1	1	1	0	1	1	0	1	1	1	1	0	1	1	1	1	1
RM420	210bp	0	0	1	1	0	0	0	1	0	0	0	1	0	0	1	0	0	1	0	0	0	0	0	0	0	0	0	0	0	0	0	1	0	0	0	0	0	0	0	0	0	0	0	0	0	0	0	1
RM420	190bp	1	1	0	0	1	1	1	0	1	0	1	1	0	1	0	1	1	0	1	1	1	1	1	1	1	1	1	1	1	1	1	1	0	0	0	1	1	0	0	1	1	1	0	1	1	0	1	0
RM282	140bp	0	0	0	0	0	1	1	0	0	0	0	0	0	1	0	0	0	0	0	0	0	0	0	0	0	0	0	0	0	0	0	0	0	0	0	0	0	0	0	1	0	0	1	1	1	0	0	0
RM282	136bp	1	1	1	1	1	1	1	1	1	1	1	1	1	1	1	1	1	0	1	1	1	1	0	1	1	1	1	1	1	1	1	1	1	1	1	1	0	1	1	0	1	1	0	0	0	1	1	1
RM210	145BP	0	0	0	0	0	0	0	0	0	0	0	0	0	0	0	1	0	0	1	1	1	0	0	0	0	0	0	0	0	0	0	0	0	0	0	0	0	0	0	0	1	0	0	0	0	0	0	0
RM210	125bp	1	1	1	1	1	1	1	1	1	1	1	1	0	1	1	0	1	1	0	0	0	1	1	1	1	1	1	1	1	1	1	1	1	1	1	1	1	1	1	0	1	0	1	1	1	1	1	1
RM125	123bp	1	1	1	0	1	1	1	1	1	1	1	1	1	1	1	1	1	1	1	1	1	1	1	1	1	1	1	1	1	1	1	1	1	1	1	1	1	0	1	1	1	0	1	1	1	1	1	1
RM125	127bp	0	0	0	0	0	0	0	0	0	0	0	0	0	0	0	0	0	0	0	0	0	0	0	0	0	0	0	0	0	0	0	0	0	0	0	0	0	0	0	0	0	1	0	0	0	0	0	0
RM5352	125bp	0	1	0	1	1	0	0	1	0	1	1	0	1	0	0	0	0	0	0	0	0	0	0	0	0	1	0	0	0	0	1	1	1	1	1	1	1	1	1	1	0	1	0	1	1	1	1	1
RM5352	103bp	1	0	1	0	0	1	1	0	1	0	0	1	0	0	0	0	0	0	0	0	0	0	0	0	0	0	1	0	0	1	0	0	0	0	0	0	0	1	0	0	1	0	1	0	0	0	0	0
RM4455	120bp	1	0	0	0	0	1	1	1	1	1	1	1	1	1	1	0	1	0	0	1	1	1	1	1	1	0	1	1	1	1	0	0	1	1	1	1	0	0	1	1	0	0	1	0	1	1	1	1
RM4455	105bp	0	1	0	0	1	0	0	0	0	0	0	0	1	0	0	1	0	1	0	0	0	0	0	0	0	1	0	0	0	0	1	1	0	0	0	0	0	0	0	0	0	0	0	0	0	0	0	0
RM157	115bp	0	1	0	1	1	0	0	1	0	1	1	0	1	0	0	0	0	0	0	0	1	0	0	1	0	1	0	0	0	1	0	1	0	0	0	1	1	1	1	1	0	1	0	1	1	1	0	0
RM157	103bp	0	0	0	0	0	1	1	0	1	0	0	1	0	0	1	0	0	1	1	0	0	0	0	0	0	0	1	0	0	0	0	0	0	0	0	0	0	0	0	0	1	0	1	0	0	0	0	0
RM195	305bp	1	1	1	1	0	0	1	1	1	1	0	1	1	1	0	0	1	1	1	1	0	0	0	0	0	1	1	0	1	0	1	1	0	0	0	1	0	0	1	0	0	0	1	1	1	1	0	0
RM195	370bp	0	1	0	0	1	1	0	0	0	0	1	0	0	0	1	1	0	0	0	0	1	1	1	1	0	0	0	1	0	0	0	1	1	1	1	1	1	1	0	0	1	1	0	0	0	0	1	1
RM5704	210bp	1	1	1	0	0	1	1	1	1	1	0	1	1	1	0	0	1	1	1	1	0	0	0	0	0	1	1	0	1	0	1	1	0	0	0	1	0	0	1	1	0	0	1	1	1	1	0	0
RM5704	198bp	0	0	0	1	1	0	0	0	0	0	1	0	0	0	1	1	0	0	0	0	1	1	1	1	1	0	0	1	0	1	0	0	1	1	1	0	1	1	0	0	1	1	0	0	0	0	1	1
RM184	125bp	0	0	0	0	0	0	0	0	0	0	0	0	0	0	0	0	0	0	0	0	0	0	0	1	0	0	0	0	0	0	0	0	0	0	0	0	0	0	1	0	1	1	0	0	0	1	0	0
RM184	120bp	1	1	1	1	1	1	1	1	1	1	1	1	1	1	1	1	1	1	1	1	1	1	1	0	0	1	1	1	1	1	1	1	1	1	1	1	1	1	0	1	0	0	1	1	1	1	1	1
RM433	224bp	1	1	1	1	1	0	1	1	1	1	1	1	1	1	1	1	0	1	0	1	1	1	1	1	1	1	1	0	1	1	0	1	1	1	1	1	0	1	0	1	0	1	1	0	1	1	0	0
RM433	245bp	0	0	0	0	0	1	0	0	0	0	0	0	0	0	0	0	1	0	1	0	0	0	0	0	0	0	0	1	0	0	1	0	0	0	0	0	1	0	1	0	1	0	0	1	0	0	1	1
RM423	210bp	1	0	1	1	1	1	0	0	0	0	0	1	0	1	1	1	0	0	0	1	0	0	0	1	1	1	0	0	1	0	0	0	0	0	0	0	0	0	0	0	0	0	0	1	1	1	0	0
RM423	273bp	0	1	0	0	0	0	1	1	1	1	1	0	1	0	0	0	1	1	1	0	1	1	1	0	0	0	1	1	0	1	1	1	1	1	1	1	1	1	1	1	1	1	1	0	0	0	1	1
RM561	190bp	0	1	0	0	0	0	1	1	1	1	1	0	1	0	0	0	1	1	1	0	0	0	1	1	1	0	1	1	0	1	1	1	1	1	1	1	1	1	1	1	1	1	1	1	0	0	1	1
RM561	175bp	1	0	1	1	1	1	0	0	0	0	0	1	0	1	1	1	0	0	0	1	1	1	0	0	0	1	0	0	1	0	0	0	0	0	0	0	0	0	0	0	0	0	0	0	1	1	0	0
RM511	130bp	0	0	0	0	0	0	0	0	0	0	0	1	1	0	0	0	0	0	1	0	0	1	0	0	0	0	1	1	0	1	1	0	0	1	0	0	1	0	1	1	0	0	1	1	0	0	1	0
RM511	145bp	1	1	1	1	1	1	1	1	1	1	1	0	0	1	1	1	1	1	0	1	1	0	1	1	1	1	0	0	1	0	0	1	1	0	1	1	0	1	0	0	1	1	0	0	1	1	0	1
RM5931	202bp	1	1	1	1	1	0	1	0	0	1	1	1	0	1	1	1	1	1	0	1	1	1	1	1	1	1	1	1	1	1	1	1	1	1	1	0	1	1	1	1	1	1	1	1	1	1	1	1
RM5931	195bp	0	0	0	0	0	1	0	1	1	0	0	0	1	0	0	0	0	0	1	0	0	0	0	0	0	0	0	0	0	0	0	0	0	0	0	1	0	0	0	0	0	0	0	0	0	0	0	0
RM7403	105bp	1	0	1	1	1	1	1	0	1	1	1	0	1	1	1	1	1	1	1	1	0	0	1	1	0	0	1	1	1	1	1	1	1	1	1	1	1	1	0	1	1	1	1	1	1	0	1	1
RM7403	96bp	0	1	0	0	0	0	0	1	0	0	0	1	0	0	0	0	0	0	0	0	1	1	0	0	1	1	0	0	0	0	0	0	0	0	0	0	0	0	1	0	0	0	0	0	0	1	0	0
RM349	136bp	1	0	1	1	1	1	1	0	1	1	1	1	0	1	1	1	1	1	1	1	1	0	1	1	1	1	1	1	1	1	1	1	0	1	1	0	1	1	1	1	1	1	1	1	1	1	1	1
RM349	160bp	0	1	0	0	0	0	0	1	0	0	0	0	1	0	0	0	0	0	0	0	0	1	0	0	0	0	0	0	0	0	0	0	1	0	0	1	0	0	0	0	0	0	0	0	0	0	0	0
RM3917	225bp	1	1	1	1	1	0	1	1	1	1	1	1	1	1	1	1	0	1	0	1	1	1	1	1	1	1	1	0	1	1	0	1	1	1	1	1	0	1	0	1	0	1	1	0	1	1	0	1
RM3917	246bp	0	0	0	0	0	1	0	0	0	0	0	0	0	0	0	0	1	0	1	0	0	0	0	0	0	0	0	1	0	0	1	0	0	0	0	0	1	0	1	0	1	0	0	1	0	0	1	0
RM521	260bp	0	1	0	0	0	0	1	1	1	1	1	0	1	0	0	0	1	1	1	0	1	1	1	0	0	0	1	1	0	1	1	1	1	1	1	1	1	1	1	1	1	1	1	0	0	0	1	1
RM521	205bp	1	0	1	1	1	1	0	0	0	0	0	1	0	1	1	1	0	0	0	1	0	0	0	1	1	1	0	0	1	0	0	0	0	0	0	0	0	0	0	0	0	0	0	1	1	1	0	0
RM552	195bp	1	0	1	1	1	1	0	0	0	0	0	1	0	1	1	1	0	0	0	1	0	0	0	0	1	1	0	0	1	0	0	0	0	0	0	0	0	0	0	0	0	0	0	1	1	1	0	0
RM552	210bp	0	1	0	0	0	0	1	1	1	1	1	0	1	0	0	0	1	1	1	0	1	1	1	1	0	0	1	1	0	1	1	1	1	1	1	1	1	1	1	1	1	1	1	0	0	0	1	1
RM129	205bp	1	1	1	1	1	0	1	0	1	1	1	1	0	1	1	1	1	1	0	1	1	1	1	1	1	1	1	1	1	1	1	1	1	1	1	0	1	1	1	1	1	1	1	1	1	1	1	1
RM129	190bp	0	0	0	0	0	1	0	1	0	0	0	0	1	0	0	0	0	0	1	0	0	0	0	0	0	0	0	0	0	0	0	0	0	0	0	1	0	0	0	0	0	0	0	0	0	0	0	0
RM335	205bp	1	0	1	1	1	1	1	0	1	1	1	0	0	1	1	1	1	1	1	1	0	0	1	1	0	0	1	1	1	0	1	1	1	1	0	1	1	1	0	0	1	1	1	1	1	0	1	1
RM335	188bp	0	1	0	0	0	0	0	1	0	0	0	1	1	0	0	0	0	0	0	0	1	1	0	0	1	1	0	0	0	1	0	0	0	0	1	0	0	0	1	1	0	0	0	0	0	1	0	0
RM457	150bp	1	0	1	1	1	1	1	0	1	1	1	1	0	1	1	1	1	1	1	1	1	1	1	1	1	1	1	1	1	1	1	1	0	1	1	0	1	1	1	1	1	1	1	1	1	1	1	1
RM457	180bp	0	1	0	0	0	0	0	1	0	0	0	0	1	0	0	0	0	0	0	0	0	0	0	0	0	0	0	0	0	0	0	0	1	0	0	1	0	0	0	0	0	0	0	0	0	0	0	0
RM427	191bp	1	1	1	1	0	0	1	1	0	1	1	0	1	0	0	1	1	1	0	1	1	1	1	0	1	1	1	1	0	1	1	1	1	1	0	1	1	1	0	1	0	0	0	1	1	1	0	1
RM427	200bp	0	0	0	0	1	1	0	0	1	0	0	1	0	1	1	0	0	0	1	0	0	0	0	1	0	0	0	0	1	0	0	0	0	0	1	0	0	0	1	0	1	1	1	0	0	0	1	0
RM205	80bp	1	0	0	0	0	0	1	0	0	0	0	1	0	1	0	0	1	0	0	0	0	0	0	0	0	0	0	1	0	0	1	0	1	0	1	1	0	1	0	1	0	0	0	0	0	0	0	1
RM205	110bp	0	1	1	1	1	1	0	1	1	1	1	0	1	0	1	1	0	1	1	1	1	1	1	1	1	1	1	0	1	1	0	1	0	1	0	0	1	0	1	0	1	1	1	1	1	1	1	0
RM8263	205bp	0	0	1	1	0	0	0	1	0	0	0	1	1	1	1	0	1	1	0	0	0	1	1	0	0	0	0	1	1	1	0	0	0	0	0	0	0	0	0	0	0	0	0	0	0	0	1	0
RM8263	193bp	1	1	0	0	1	1	1	0	1	1	1	0	0	0	0	1	0	0	1	1	1	0	0	1	1	1	1	0	0	0	1	1	1	1	1	1	1	1	1	1	1	1	1	1	1	1	0	1
RM1337	90bp	1	0	0	0	0	0	0	0	0	1	0	0	0	0	0	1	0	0	1	0	0	0	1	0	0	0	1	1	1	0	0	1	0	0	0	0	0	0	0	0	0	0	0	1	0	0	1	1
RM1337	110bp	0	1	1	1	1	1	1	1	1	0	1	1	1	1	1	0	1	1	0	1	1	1	0	1	1	1	0	0	0	1	1	0	1	1	1	1	1	1	1	1	1	1	1	0	1	1	0	0
RM346	60bp	0	1	0	1	1	0	0	0	1	1	1	1	0	0	0	0	0	1	1	0	0	0	1	1	0	0	0	0	0	1	0	0	0	0	1	0	1	1	1	0	1	1	0	0	0	0	0	0
RM346	75bp	1	0	1	0	0	1	1	1	0	0	0	0	1	1	1	1	1	0	0	1	1	1	0	0	1	1	1	1	1	0	1	1	1	1	0	1	0	0	0	1	0	0	1	1	1	1	1	1
[truncated: 9 more columns]

## Sheet: Sheet1
markers	RM319	RM319	RM22597	RM22597	RM3533	RM3533	RM7653	RM7653	RM4601	RM4601	RM4601	RM13912	RM13912	RM13912	RM36	RM36	RM36	RM81	RM81	RM81	RM 1018	RM 1018	RM 286	RM 286	RM1896	RM1896	RM 8134	RM 8134	RM5709	RM5709	RM310	RM310	RM559	RM559	RM16559	RM16559	RM420	RM420	RM282	RM282	RM210	RM210	RM125	RM125	RM5352	RM5352	RM4455	RM4455	RM157
bp	134bp	175bp	249bp	255 bp	125 bp	120 bp	121 bp	125 bp	118bp	120 bp	115 bp	190 bp	195 bp	185 bp	192 bp	197 bp	180 bp	110 bp	120bp	105 bp	160bp	170 bp	110 bp	100bp	102bp	108bp	111bp	107bp	113BP	110bp	105bp	100bp	180bp	160bp	210bp	197 bp	210bp	190bp	140bp	136bp	145BP	125bp	123bp	127bp	125bp	103bp	120bp	105bp	115bp
TNAU 1S	1	0	0	0	0	1	1	0	1	0	0	0	0	0	0	0	0	1	0	0	1	0	1	1	0	1	1	0	1	0	1	0	1	0	0	1	0	1	0	1	0	1	1	0	0	1	1	0	0
TNAU 2S	0	1	1	0	0	1	1	0	1	0	0	1	0	0	1	0	0	0	1	0	0	1	1	1	0	1	1	0	1	0	1	0	0	1	1	1	0	1	0	1	0	1	1	0	1	0	0	1	1
TNAU 4S	1	0	1	0	0	1	1	0	0	0	0	1	0	0	1	0	0	1	0	0	1	1	0	1	0	1	0	0	1	0	0	0	1	0	0	0	1	0	0	1	0	1	1	0	0	1	0	0	0
TNAU 4S-1	1	0	1	0	0	1	1	0	1	1	0	1	0	0	1	0	0	0	1	0	1	0	1	0	0	1	1	0	0	0	1	0	0	0	0	1	1	0	0	1	0	1	0	0	1	0	0	0	1
TNAU 15S	1	0	1	0	0	1	1	0	1	0	0	1	0	0	1	0	0	1	1	0	1	1	0	1	1	0	0	1	1	0	0	1	0	0	0	1	0	1	0	1	0	1	1	0	1	0	0	1	1
TNAU 16S	1	0	1	0	0	1	1	0	1	0	0	1	0	0	1	0	0	0	0	0	1	0	1	0	0	1	1	0	1	0	1	0	0	0	0	1	0	1	1	1	0	1	1	0	0	1	1	0	0
TNAU 18S	1	0	1	1	0	1	1	0	1	0	0	1	0	0	1	0	0	0	0	0	1	0	1	0	0	1	1	0	1	0	1	0	1	0	1	1	0	1	1	1	0	1	1	0	0	1	1	0	0
TNAU 19S	0	1	1	1	0	1	1	0	1	0	0	1	0	0	1	0	0	0	1	0	1	1	0	1	1	0	1	1	0	0	0	1	1	0	0	1	1	0	0	1	0	1	1	0	1	0	1	0	1
TNAU 23S	1	0	1	1	0	1	1	0	1	0	0	1	0	0	1	0	0	1	0	1	1	1	1	0	0	1	0	0	0	0	1	0	0	0	0	0	0	1	0	1	0	1	1	0	0	1	1	0	0
TNAU 30S	1	0	1	0	0	1	1	0	1	0	0	1	0	0	1	0	0	0	1	0	1	1	0	1	1	0	0	1	1	1	0	1	1	0	0	1	0	0	0	1	0	1	1	0	1	0	1	0	1
TNAU 31S	1	0	1	0	0	1	1	0	1	0	0	1	0	0	1	0	0	0	1	0	1	1	0	1	1	0	0	1	0	0	0	1	0	0	0	1	0	1	0	1	0	1	1	0	1	0	1	0	1
TNAU 34S	1	0	0	0	0	1	0	1	1	0	0	1	0	0	1	0	0	0	0	1	1	1	0	1	1	0	0	1	1	1	0	1	0	0	0	1	1	1	0	1	0	1	1	0	0	1	1	0	0
TNAU 37S	0	1	0	0	1	0	1	0	1	0	0	1	0	0	0	0	1	0	1	0	1	1	1	0	1	1	1	0	0	0	1	0	1	0	0	1	0	0	0	1	0	0	1	0	1	0	1	1	1
TNAU 38S	1	0	1	1	0	1	0	1	0	0	0	1	0	0	1	0	0	0	0	0	1	1	1	0	0	1	1	0	0	0	1	0	1	0	0	1	0	1	1	1	0	1	1	0	0	0	1	0	0
TNAU 39S	1	0	1	0	1	0	0	0	1	0	0	1	0	0	1	0	0	0	0	1	1	1	1	1	0	1	1	1	1	1	1	0	1	0	0	1	1	0	0	1	0	1	1	0	0	0	1	0	0
TNAU 45S	1	0	1	1	0	1	1	0	0	0	0	1	0	0	1	0	0	1	1	0	1	0	0	0	1	0	0	0	0	0	0	1	1	0	0	1	0	1	0	1	1	0	1	0	0	0	0	1	0
TNAU 50S	1	0	1	0	0	1	1	0	1	1	0	1	0	0	1	0	0	0	0	0	1	1	1	0	0	1	1	0	0	0	1	0	1	1	0	1	0	1	0	1	0	1	1	0	0	0	1	0	0
TNAU 51S	1	0	1	1	0	1	1	0	0	0	0	1	0	0	1	0	0	0	0	1	1	0	1	0	0	1	1	0	0	0	1	0	0	0	1	0	1	0	0	0	0	1	1	0	0	0	0	1	0
TNAU 53S	1	0	1	1	0	1	1	0	1	0	1	1	0	0	1	0	0	0	0	1	0	1	1	0	0	1	1	0	1	1	1	0	1	0	1	0	0	1	0	1	1	0	1	0	0	0	0	0	0
TNAU 59S-1	1	0	1	1	0	1	1	0	1	0	0	0	1	0	0	1	0	0	0	1	1	1	0	1	0	0	0	1	1	1	0	1	1	0	1	0	0	1	0	1	1	0	1	0	0	0	1	0	0
TNAU 59S-2	1	0	1	0	0	1	1	0	1	0	0	1	0	0	1	0	0	1	0	0	0	1	0	1	1	0	0	1	0	0	0	1	0	0	0	1	0	1	0	1	1	0	1	0	0	0	1	0	1
TNAU 60S	0	1	0	0	0	1	1	0	0	0	0	1	0	0	1	0	0	1	0	0	0	1	1	0	1	1	1	0	0	0	1	0	0	0	1	1	0	1	0	1	0	1	1	0	0	0	1	0	0
TNAU 71S	1	0	1	0	0	1	1	1	1	0	0	1	0	0	1	0	0	1	0	0	0	0	0	1	1	0	0	1	0	0	0	1	0	1	1	1	0	1	0	0	0	1	1	0	0	0	1	0	0
TNAU 82S	1	0	1	0	1	0	0	0	1	0	0	1	0	1	0	0	1	1	0	0	1	1	0	1	1	0	0	1	1	1	0	1	0	1	0	1	0	1	0	1	0	1	1	0	0	0	1	0	1
TNAU 83S	1	0	0	0	0	1	0	0	0	0	0	1	0	0	0	0	0	0	0	0	1	1	1	0	0	1	1	0	1	0	1	0	0	1	0	0	0	1	0	1	0	1	1	0	0	0	1	0	0
TNAU 85S	1	0	1	0	0	1	1	0	1	0	0	0	1	0	0	0	0	0	0	0	1	0	1	0	0	1	0	0	1	0	1	0	0	1	0	1	0	1	0	1	0	1	1	0	1	0	0	1	1
TNAU 86S	1	0	1	0	0	1	1	0	1	0	0	1	0	0	1	0	0	1	1	0	0	1	1	0	0	1	0	0	1	0	1	0	1	0	0	1	0	1	0	1	0	1	1	0	0	1	1	0	0
TNAU 92S	1	0	1	0	0	1	1	0	1	0	0	1	0	0	1	0	0	0	0	0	1	1	1	0	0	1	0	0	1	0	1	0	1	0	1	0	0	1	0	1	0	1	1	0	0	0	1	0	0
TNAU 93S	1	0	1	0	0	1	1	0	0	0	1	1	0	0	1	0	0	0	0	0	0	1	0	0	0	0	0	0	1	0	0	0	1	0	1	0	0	1	0	1	0	1	1	0	0	0	1	0	0
TNAU 95S	1	0	0	0	0	0	0	0	1	0	0	0	0	0	0	0	0	0	0	0	1	0	1	0	0	1	1	0	1	0	1	0	1	0	0	1	0	1	0	1	0	1	1	0	0	1	1	0	1
TNAU 98S	1	0	1	0	0	1	1	0	1	0	0	1	0	0	1	0	0	1	0	0	1	0	1	0	0	1	1	0	1	0	1	0	1	0	0	1	0	1	0	1	0	1	1	0	1	0	0	1	0
TNAU 100S	1	0	1	1	0	1	1	0	1	0	0	1	0	0	1	0	0	1	0	0	1	1	1	0	0	1	1	0	1	0	1	0	1	0	0	1	1	1	0	1	0	1	1	0	1	0	0	1	1
TNAU 101S	0	1	1	1	0	1	1	0	1	0	0	1	0	0	1	0	0	1	0	0	1	1	0	0	1	0	0	1	1	0	0	1	1	0	0	1	0	0	0	1	0	1	1	0	1	0	1	0	0
TNAU 102S	1	0	1	1	0	1	1	0	1	0	0	1	0	0	1	0	0	1	0	0	1	1	0	0	1	1	0	1	1	0	0	1	1	0	0	1	0	0	0	1	0	1	1	0	1	0	1	0	0
TNAU 103S	1	0	0	1	0	1	1	0	1	0	1	1	0	0	1	0	0	1	0	0	1	0	1	0	0	1	1	0	1	0	1	0	1	0	0	0	0	0	0	1	0	1	1	0	1	0	1	0	0
TNAU 106S	0	1	1	0	0	1	1	0	1	0	0	1	0	0	1	0	0	1	0	0	1	0	0	1	1	0	0	1	1	0	0	1	1	0	0	1	0	1	0	1	0	1	1	0	1	0	1	0	1
TNAU 107S	1	0	1	0	0	1	1	0	1	0	0	1	0	0	1	0	0	1	0	0	0	1	1	1	0	0	1	0	1	0	1	0	1	0	1	1	0	1	0	0	0	1	1	0	1	0	0	0	1
TNAU 111S	1	0	1	0	0	1	1	0	1	0	0	0	0	0	0	0	0	1	0	0	0	0	0	0	1	1	0	1	1	0	0	1	1	0	0	0	0	0	0	1	0	1	0	0	1	1	0	0	1
TNAU 112S	1	0	1	0	1	0	1	0	1	0	0	1	1	0	1	0	1	1	0	1	1	0	0	0	1	1	0	1	1	0	0	1	1	0	0	1	0	0	0	1	0	1	1	0	1	0	1	0	1
TNAU 113S	1	0	1	0	0	1	1	0	1	0	0	0	0	0	0	0	0	1	0	0	1	0	0	0	1	1	0	1	1	0	0	1	1	0	1	1	0	1	1	0	0	0	1	0	1	0	1	0	1
TNAU 114S	1	0	1	0	0	1	1	0	0	0	1	1	0	0	1	0	0	1	0	0	1	1	1	1	0	0	1	0	1	0	0	0	1	0	0	1	0	1	0	1	1	1	1	0	0	1	0	0	0
TNAU 115S	1	0	1	0	0	1	1	0	1	0	0	1	0	0	1	0	0	0	0	1	0	1	0	0	1	0	0	1	1	0	0	1	1	0	0	1	0	1	0	1	0	0	0	1	1	0	0	0	1
TNAU 115S-1	1	0	1	1	0	1	1	0	1	0	0	1	0	0	1	0	0	0	0	0	1	0	0	1	1	0	0	1	1	0	0	1	1	0	1	0	0	0	1	0	0	1	1	0	0	1	1	0	0
TNAU 116S	1	0	1	1	1	0	1	1	0	0	0	1	0	0	1	0	1	0	0	0	1	0	1	1	0	1	1	0	1	0	1	0	0	0	0	1	0	1	1	0	0	1	1	0	1	0	0	0	1
TNAU 120S	1	0	1	1	0	1	1	0	0	0	0	0	0	0	0	1	0	1	0	1	0	1	1	1	0	0	1	0	1	0	1	0	0	0	0	1	0	1	1	0	0	1	1	0	1	0	1	0	1
TNAU 126S-1	1	0	1	1	1	0	1	1	0	0	0	1	0	1	1	0	0	0	0	1	0	1	0	1	1	1	0	1	1	0	0	1	1	0	0	1	0	0	0	1	0	1	1	0	1	0	1	0	1
TNAU 126S-2	1	0	1	0	0	1	1	0	0	0	0	1	0	0	1	0	0	1	0	0	0	1	0	0	1	0	0	1	0	0	0	1	1	0	0	1	0	1	0	1	0	1	1	0	1	0	1	0	0
TNAU 127S	1	0	1	0	0	1	1	0	0	0	0	1	0	0	1	0	0	0	0	0	1	0	0	0	1	1	0	1	0	1	0	1	0	1	0	1	1	0	0	1	0	1	1	0	1	0	1	0	0
TNAU 129S	1	0	1	0	0	1	1	0	0	0	0	1	0	0	1	0	0	0	0	0	1	1	1	0	0	1	1	0	1	0	1	0	1	0	0	1	0	1	0	1	1	1	1	0	1	0	0	1	0
TNAU 131S	1	0	0	0	0	0	0	0	0	0	1	0	0	0	1	0	0	0	0	0	1	0	1	0	1	1	0	0	1	1	1	1	1	1	0	1	0	1	0	1	0	0	1	0	1	0	0	1	0
TNAU 132S	1	0	1	0	0	1	1	0	1	0	1	1	0	0	1	0	0	1	0	0	1	1	1	0	0	1	0	0	1	0	1	0	1	0	0	1	1	0	0	1	0	0	1	0	0	1	1	0	0
TNAU 135S	1	0	0	0	0	1	1	0	0	0	1	1	0	0	1	0	0	1	0	0	0	0	1	0	0	1	0	0	0	1	1	0	1	0	0	1	0	1	0	1	0	0	1	0	1	0	0	1	0
TNAU 136S	0	1	0	0	0	1	1	0	0	0	1	1	0	0	1	0	0	0	0	1	1	0	0	0	1	0	0	1	1	0	1	1	1	0	0	1	0	1	0	1	0	0	1	0	1	0	1	0	0
TNAU 137S-1	1	0	0	0	1	0	1	1	0	0	0	0	0	0	0	0	0	1	0	0	1	1	1	0	0	1	1	0	1	0	1	0	1	0	0	1	0	1	0	0	0	0	1	0	1	0	1	0	0
TNAU 137S-2	1	0	1	0	0	1	1	0	0	0	1	0	0	0	0	0	0	1	0	1	1	0	1	0	0	1	1	1	1	0	1	0	1	0	0	1	0	1	0	1	0	0	1	0	1	0	1	0	0
TNAU 142S	1	0	0	0	0	0	0	1	1	0	0	1	0	0	1	0	0	1	0	0	1	1	1	0	0	1	0	1	1	0	0	0	0	1	0	0	0	1	0	0	0	0	1	0	0	1	1	0	0
TNAU 143S	1	0	1	1	0	1	1	0	1	0	0	1	1	0	1	0	0	1	0	0	0	0	1	0	0	1	1	1	0	1	0	0	1	1	0	0	0	1	0	0	0	0	1	0	0	1	1	0	0
[truncated: 44 more columns]

## Sheet: sheet 2
Supplementary file 4. Molecular characterization of TGMS lines using the SSR markers
43	57	2	21	36	1	57
			Pop1	Pop2
		RM319	RM319	RM22597	RM22597	RM3533	RM3533	RM7653	RM7653	RM4601	RM4601	RM13912	RM13912	RM36	RM36	RM81	RM81	RM1018	RM1018	RM286	RM286	RM1896	RM1896	RM5709	RM5709	RM310	RM310	RM559	RM559	RM16559	RM16559	RM420	RM420	RM282	RM282	RM210	RM210	RM125	RM125	RM5352	RM5352	RM4455	RM4455	RM157	RM157	RM195	RM195	RM5704	RM5704
TNAU.1S	Pop1	134	134	249	249	120	120	121	121	115	115	195	195	192	192	105	105	160	160	110	110	108	108	113	113	105	105	180	180	197	197	190	190	136	136	145	145	123	123	125	125	120	120	103	103	305	305	210	210
TNAU.4S	Pop1	134	134	249	249	125	125	121	121	120	120	195	195	192	192	110	110	170	170	110	110	108	108	113	113	105	105	180	180	197	197	190	190	140	140	145	145	123	123	125	125	120	120	103	103	305	305	210	210
TNAU.45S	Pop1	134	134	249	249	120	120	121	121	118	118	195	195	192	192	110	110	160	160	100	100	108	108	113	113	105	105	180	180	197	197	190	190	136	136	125	125	123	123	103	103	120	120	103	103	305	305	210	210
TNAU.59S.1	Pop1	134	134	249	249	120	120	125	125	120	120	190	190	192	192	120	120	170	170	110	110	108	108	113	113	105	105	160	160	210	210	190	190	136	136	125	125	123	123	125	125	120	120	103	103	370	370	198	198
TNAU.60S	Pop1	134	134	249	249	120	120	121	121	118	118	190	190	192	192	120	120	160	160	110	110	108	108	113	113	105	105	180	180	197	197	190	190	136	136	125	125	123	123	103	103	120	120	103	103	370	370	210	210
TNAU.83S	Pop1	134	134	255	255	125	125	121	121	120	120	190	190	180	180	120	120	160	160	100	100	108	108	113	113	105	105	180	180	197	197	190	190	140	140	125	125	123	123	125	125	120	120	115	115	305	305	210	210
TNAU.93S	Pop1	134	134	255	255	120	120	121	121	118	118	195	195	197	197	105	105	170	170	100	100	102	102	113	113	100	100	180	180	210	210	190	190	136	136	145	145	123	123	125	125	120	120	103	103	305	305	210	210
TNAU.103S	Pop1	134	134	249	249	120	120	121	121	118	118	195	195	180	180	120	120	160	160	110	110	108	108	113	113	105	105	160	160	197	197	190	190	136	136	125	125	123	123	125	125	105	105	115	115	305	305	210	210
TNAU.107S	Pop1	134	134	255	255	120	120	121	121	120	120	195	195	197	197	105	105	170	170	110	110	102	102	113	113	105	105	180	180	197	197	190	190	140	140	125	125	123	123	125	125	120	120	115	115	305	305	210	210
TNAU.116S	Pop1	134	134	255	255	120	120	121	121	120	120	195	195	197	197	105	105	170	170	110	110	102	102	113	113	105	105	180	180	197	197	190	190	140	140	125	125	123	123	125	125	120	120	115	115	305	305	210	210
TNAU.2S	Pop1	134	134	255	255	125	125	121	121	120	120	185	185	192	192	105	105	170	170	100	100	108	108	113	113	100	100	180	180	197	197	210	210	136	136	125	125	123	123	125	125	120	120	115	115	305	305	210	210
TNAU.4S.1	Pop1	134	134	249	249	120	120	121	121	118	118	190	190	192	192	120	120	160	160	110	110	108	108	110	110	105	105	160	160	197	197	210	210	136	136	125	125	127	127	125	125	120	120	115	115	305	305	198	198
TNAU.16S	Pop1	134	134	249	249	120	120	121	121	120	120	190	190	192	192	110	110	160	160	100	100	108	108	113	113	100	100	180	180	210	210	210	210	136	136	125	125	123	123	103	103	120	120	103	103	305	305	210	210
TNAU.23S	Pop1	134	134	255	255	120	120	125	125	118	118	190	190	192	192	105	105	160	160	100	100	102	102	113	113	100	100	160	160	197	197	190	190	136	136	125	125	123	123	103	103	120	120	103	103	305	305	210	210
TNAU.34S	Pop1	134	134	249	249	120	120	121	121	115	115	190	190	192	192	120	120	170	170	110	110	102	102	113	113	100	100	180	180	210	210	190	190	136	136	125	125	123	123	125	125	120	120	103	103	305	305	210	210
TNAU.101S	Pop1	134	134	255	255	120	120	125	125	120	120	190	190	192	192	120	120	160	160	110	110	108	108	110	110	105	105	180	180	197	197	190	190	136	136	125	125	123	123	125	125	120	120	103	103	305	305	210	210
TNAU.113S	Pop1	134	134	249	249	120	120	121	121	115	115	190	190	192	192	110	110	160	160	110	110	108	108	113	113	105	105	180	180	197	197	210	210	136	136	145	145	123	123	103	103	120	120	103	103	370	370	198	198
TNAU.126S.2	Pop1	134	134	255	255	120	120	121	121	120	120	190	190	192	192	120	120	160	160	110	110	102	102	110	110	100	100	180	180	197	197	190	190	136	136	145	145	123	123	125	125	105	105	103	103	370	370	198	198
TNAU.135S	Pop1	134	134	249	249	120	120	121	121	118	118	190	190	192	192	120	120	160	160	100	100	102	102	113	113	100	100	160	160	197	197	190	190	136	136	125	125	123	123	125	125	105	105	115	115	370	370	198	198
TNAU.137S.1	Pop1	134	134	249	249	125	125	125	125	118	118	190	190	192	192	105	105	160	160	100	100	108	108	113	113	105	105	180	180	197	197	210	210	136	136	125	125	123	123	125	125	120	120	103	103	370	370	198	198
TNAU.53S	Pop1	134	134	249	249	125	125	125	125	118	118	185	185	180	180	110	110	170	170	100	100	102	102	113	113	100	100	160	160	197	197	190	190	136	136	125	125	123	123	125	125	120	120	115	115	370	370	198	198
TNAU.15S	Pop2	134	134	255	255	120	120	121	121	115	115	190	190	192	192	105	105	170	170	110	110	108	108	113	113	105	105	180	180	210	210	190	190	136	136	145	145	123	123	125	125	120	120	103	103	305	305	210	210
TNAU.30S	Pop2	134	134	249	249	120	120	121	121	120	120	190	190	192	192	105	105	160	160	110	110	108	108	113	113	105	105	180	180	197	197	190	190	136	136	125	125	123	123	125	125	105	105	103	103	370	370	198	198
TNAU.39S	Pop2	134	134	249	249	120	120	121	121	115	115	190	190	192	192	110	110	160	160	110	110	108	108	110	110	105	105	180	180	197	197	190	190	136	136	145	145	123	123	125	125	105	105	103	103	370	370	198	198
TNAU.86S	Pop2	134	134	249	249	120	120	121	121	118	118	190	190	192	192	110	110	170	170	100	100	102	102	113	113	105	105	180	180	210	210	190	190	140	140	125	125	123	123	125	125	120	120	115	115	370	370	198	198
TNAU.98S	Pop2	134	134	255	255	120	120	121	121	118	118	190	190	192	192	110	110	170	170	110	110	108	108	113	113	105	105	180	180	197	197	210	210	136	136	125	125	123	123	125	125	105	105	115	115	305	305	210	210
TNAU.112S	Pop2	134	134	249	249	120	120	121	121	115	115	190	190	192	192	110	110	170	170	100	100	108	108	113	113	100	100	180	180	197	197	190	190	136	136	125	125	123	123	103	103	120	120	103	103	370	370	198	198
TNAU.129S	Pop2	134	134	249	249	125	125	125	125	115	115	195	195	192	192	120	120	160	160	110	110	108	108	113	113	100	100	160	160	197	197	190	190	136	136	145	145	123	123	125	125	105	105	103	103	370	370	198	198
TNAU.18S	Pop2	134	134	249	249	120	120	121	121	118	118	190	190	192	192	120	120	170	170	110	110	108	108	113	113	105	105	180	180	210	210	190	190	136	136	125	125	123	123	125	125	120	120	103	103	370	370	198	198
TNAU.37S	Pop2	134	134	249	249	120	120	121	121	118	118	190	190	192	192	110	110	160	160	110	110	108	108	113	113	105	105	180	180	197	197	190	190	136	136	125	125	123	123	125	125	105	105	103	103	305	305	210	210
TNAU.85S	Pop2	134	134	255	255	120	120	121	121	118	118	190	190	192	192	120	120	160	160	110	110	108	108	113	113	105	105	180	180	210	210	190	190	136	136	125	125	123	123	103	103	120	120	103	103	305	305	210	210
TNAU.92S	Pop2	134	134	249	249	120	120	121	121	118	118	190	190	192	192	120	120	170	170	110	110	108	108	113	113	105	105	180	180	197	197	190	190	136	136	125	125	123	123	103	103	120	120	103	103	305	305	210	210
TNAU.120S	Pop2	134	134	249	249	120	120	121	121	118	118	190	190	192	192	120	120	170	170	110	110	108	108	110	110	105	105	160	160	197	197	190	190	136	136	125	125	123	123	125	125	120	120	103	103	305	305	210	210
TNAU.127S	Pop2	134	134	249	249	120	120	121	121	118	118	190	190	192	192	105	105	170	170	110	110	108	108	110	110	105	105	180	180	210	210	190	190	136	136	125	125	123	123	103	103	120	120	103	103	305	305	210	210
TNAU.132S	Pop2	134	134	255	255	120	120	121	121	115	115	190	190	192	192	105	105	160	160	110	110	108	108	110	110	105	105	180	180	210	210	210	210	140	140	125	125	123	123	125	125	105	105	103	103	305	305	210	210
TNAU.142S	Pop2	134	134	249	249	120	120	121	121	118	118	190	190	192	192	120	120	170	170	110	110	108	108	110	110	105	105	160	160	197	197	190	190	136	136	125	125	123	123	125	125	120	120	103	103	305	305	210	210
TNAU.143S	Pop2	134	134	255	255	120	120	121	121	118	118	190	190	192	192	110	110	160	160	110	110	108	108	110	110	100	100	160	160	210	210	190	190	140	140	145	145	123	123	103	103	120	120	103	103	305	305	210	210
TNAU.19S	Pop2	134	134	249	249	120	120	121	121	115	115	190	190	192	192	110	110	170	170	110	110	102	102	110	110	100	100	180	180	197	197	190	190	136	136	125	125	123	123	125	125	120	120	103	103	370	370	198	198
TNAU.31S	Pop2	134	134	249	249	120	120	121	121	118	118	190	190	192	192	120	120	170	170	100	100	102	102	113	113	100	100	180	180	197	197	210	210	136	136	125	125	123	123	125	125	120	120	115	115	305	305	210	210
TNAU.38S	Pop2	134	134	249	249	120	120	121	121	118	118	190	190	192	192	120	120	170	170	100	100	102	102	110	110	100	100	180	180	197	197	190	190	136	136	125	125	123	123	125	125	120	120	115	115	370	370	198	198
TNAU.51S	Pop2	134	134	249	249	120	120	121	121	115	115	190	190	192	192	120	120	160	160	100	100	108	108	110	110	100	100	160	160	197	197	210	210	136	136	125	125	123	123	125	125	120	120	103	103	370	370	198	198
TNAU.100S	Pop2	134	134	249	249	120	120	121	121	118	118	190	190	192	192	105	105	170	170	110	110	102	102	113	113	100	100	180	180	197	197	190	190	136	136	145	145	127	127	125	125	120	120	115	115	370	370	198	198
TNAU.114S	Pop2	134	134	249	249	120	120	121	121	118	118	190	190	192	192	105	105	170	170	110	110	102	102	113	113	100	100	180	180	197	197	190	190	136	136	145	145	127	127	125	125	120	120	115	115	370	370	198	198
TNAU.115S.2	Pop2	134	134	249	249	120	120	121	121	118	118	190	190	192	192	110	110	160	160	110	110	102	102	110	110	100	100	160	160	210	210	190	190	140	140	125	125	123	123	125	125	120	120	103	103	370	370	198	198
TNAU.50S	Pop2	134	134	249	249	125	125	121	121	118	118	190	190	180	180	105	105	160	160	100	100	108	108	113	113	100	100	180	180	197	197	210	210	136	136	125	125	123	123	125	125	120	120	115	115	305	305	210	210
TNAU.71S	Pop2	175	175	255	255	120	120	121	121	115	115	190	190	192	192	105	105	160	160	100	100	102	102	113	113	105	105	180	180	197	197	190	190	136	136	145	145	123	123	125	125	120	120	103	103	305	305	210	210
TNAU.59S.2	Pop2	175	175	255	255	120	120	121	121	115	115	190	190	192	192	110	110	170	170	110	110	108	108	110	110	105	105	180	180	210	210	190	190	136	136	125	125	123	123	125	125	120	120	103	103	370	370	198	198
TNAU.102S	Pop2	175	175	249	249	120	120	121	121	118	118	190	190	192	192	120	120	170	170	100	100	102	102	110	110	100	100	180	180	197	197	210	210	136	136	125	125	123	123	125	125	120	120	115	115	305	305	210	210
TNAU.106S	Pop2	175	175	249	249	120	120	121	121	118	118	190	190	192	192	120	120	170	170	100	100	108	108	113	113	105	105	160	160	210	210	190	190	136	136	125	125	123	123	125	125	105	105	115	115	305	305	210	210
TNAU.126S.1	Pop2	175	175	249	249	120	120	121	121	118	118	190	190	192	192	110	110	160	160	100	100	102	102	113	113	100	100	180	180	197	197	190	190	136	136	125	125	123	123	125	125	120	120	115	115	305	305	210	210
TNAU.131S	Pop2	175	175	255	255	125	125	121	121	118	118	190	190	180	180	120	120	170	170	110	110	108	108	110	110	105	105	180	180	197	197	210	210	136	136	145	145	123	123	125	125	105	105	115	115	305	305	210	210
TNAU.82S	Pop2	134	134	255	255	125	125	125	125	118	118	195	195	192	192	110	110	160	160	110	110	108	108	113	113	105	105	180	180	197	197	190	190	136	136	125	125	123	123	103	103	120	120	115	115	370	370	198	198
TNAU.95S	Pop2	134	134	249	249	120	120	121	121	118	118	195	195	192	192	110	110	160	160	100	100	108	108	113	113	100	100	180	180	210	210	190	190	140	140	145	145	123	123	125	125	120	120	115	115	370	370	210	210
TNAU.111S	Pop2	134	134	249	249	120	120	121	121	118	118	190	190	192	192	110	110	170	170	100	100	108	108	113	113	100	100	180	180	197	197	210	210	136	136	125	125	123	123	125	125	120	120	103	103	370	370	198	198
TNAU.115S.1	Pop2	134	134	255	255	120	120	121	121	118	118	190	190	192	192	110	110	160	160	110	110	108	108	113	113	105	105	180	180	210	210	210	210	136	136	125	125	123	123	125	125	120	120	103	103	370	370	198	198
TNAU.136S	Pop2	175	175	249	249	120	120	121	121	118	118	190	190	192	192	110	110	170	170	110	110	102	102	113	113	100	100	180	180	197	197	210	210	136	136	125	125	123	123	125	125	120	120	103	103	370	370	198	198
TNAU.137S.2	Pop2	134	134	249	249	120	120	121	121	118	118	195	195	192	192	110	110	160	160	110	110	108	108	113	113	100	100	180	180	210	210	210	210	136	136	125	125	127	127	103	103	120	120	115	115	370	370	198	198
[truncated: 38 more columns]
