# Supplementary material for: Genotypic and phenotypic characterization of thermo-sensitive genic male sterile (TGMS) rice lines using simple sequence repeat (SSR) markers and population structure analysis
Source: PeerJ journal article supplement (doi:10.7717/peerj.18975), 2025-05-08

Supplementary figure 1. Heat map representing the Euclidean distance between the TGMS

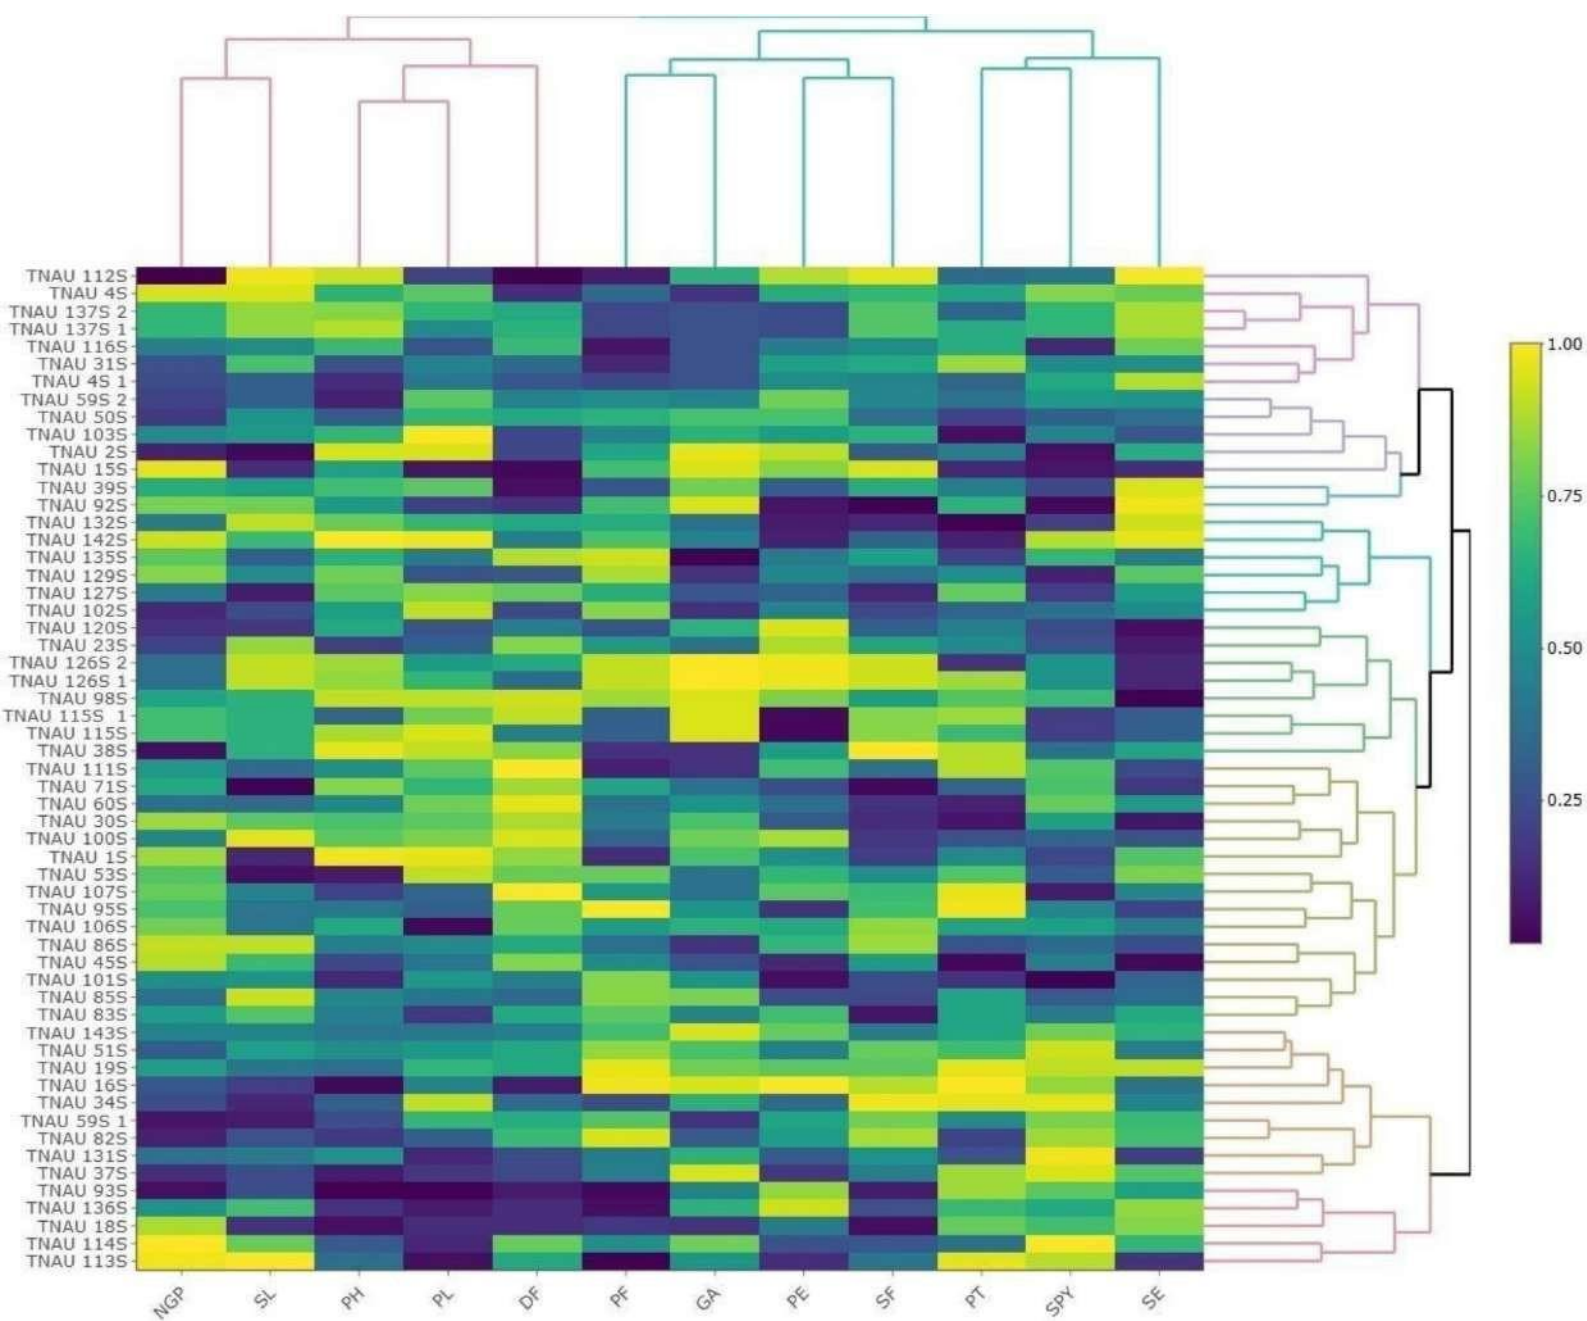

Supplement: Supplemental_figure_1.pdf [file Supplemental_figure_1.pdf]
